# Supplementary material for: Efficient ZnBr2-catalyzed reactions of allylic alcohols with indoles, sulfamides and anilines under high-speed vibration milling conditions
Source: Royal Society of Chemistry journal article supplement (doi:10.1039/c3gc40262b), 2013-01-01

## Electronic Supplementary Information

### An efficient ZnBr<sub>2</sub>-catalyzed reactions of allylic alcohols with indoles, sulfamides and anilines under high-speed vibration milling conditions

Guang-Peng Fan,<sup>a</sup> Zi Liu,<sup>a</sup> Guan-Wu Wang<sup>\*a,b</sup>

<sup>a</sup> CAS Key Laboratory of Soft Matter Chemistry, Hefei National Laboratory for Physical Sciences at Microscale, and Department of Chemistry, University of Science and Technology of China, Hefei, Anhui 230026, P. R. China

Fax: (+86)551-360-7864; E-mail: gwang@ustc.edu.cn

<sup>b</sup> State Key Laboratory of Applied Organic Chemistry, Lanzhou University, Lanzhou, Gansu 730000, P. R. China

#### NMR-spectra of compounds

|                                                         |     |
|---------------------------------------------------------|-----|
| <sup>1</sup> H NMR spectrum of product <b>3a</b>        | S3  |
| <sup>1</sup> H NMR spectrum of product <b>3b</b>        | S4  |
| <sup>1</sup> H NMR spectrum of product <b>3c</b>        | S5  |
| <sup>1</sup> H NMR spectrum of product <b>3d</b>        | S6  |
| <sup>1</sup> H NMR spectrum of product <b>3e</b>        | S7  |
| <sup>1</sup> H NMR spectrum of product <b>3f</b>        | S8  |
| <sup>1</sup> H NMR spectrum of product <b>3g</b>        | S9  |
| <sup>13</sup> C NMR spectrum of product <b>3g</b>       | S10 |
| <sup>1</sup> H NMR spectrum of product <b>3h</b>        | S11 |
| <sup>1</sup> H NMR spectrum of product <b>3i</b>        | S12 |
| <sup>13</sup> C NMR spectrum of product <b>3i</b>       | S13 |
| <sup>1</sup> H NMR spectrum of product <b>3j</b>        | S14 |
| <sup>13</sup> C NMR spectrum of product <b>3j</b>       | S15 |
| <sup>1</sup> H NMR spectrum of product <b>3k</b>        | S16 |
| <sup>1</sup> H NMR spectrum of product <b>3l</b>        | S17 |
| <sup>13</sup> C NMR spectrum of product <b>3l</b>       | S18 |
| <sup>1</sup> H NMR spectrum of product <b>3m</b>        | S19 |
| <sup>13</sup> C NMR spectrum of product <b>3m</b>       | S20 |
| <sup>1</sup> H NMR spectrum of product <b>3n</b>        | S21 |
| <sup>13</sup> C NMR spectrum of product <b>3n</b>       | S22 |
| <sup>1</sup> H NMR spectrum of product <b>3o and 3q</b> | S23 |
| <sup>1</sup> H NMR spectrum of product <b>3q</b>        | S24 |
| <sup>1</sup> H NMR spectrum of product <b>5a</b>        | S25 |
| <sup>1</sup> H NMR spectrum of product <b>5b</b>        | S26 |
| <sup>1</sup> H NMR spectrum of product <b>5c</b>        | S27 |
| <sup>1</sup> H NMR spectrum of product <b>5d</b>        | S28 |
| <sup>13</sup> C NMR spectrum of product <b>5d</b>       | S29 |
| <sup>1</sup> H NMR spectrum of product <b>5e</b>        | S30 |

|                                                   |     |
|---------------------------------------------------|-----|
| $^1\text{H}$ NMR spectrum of product <b>5f</b>    | S31 |
| $^1\text{H}$ NMR spectrum of product <b>5g</b>    | S32 |
| $^1\text{H}$ NMR spectrum of product <b>5h</b>    | S33 |
| $^{13}\text{C}$ NMR spectrum of product <b>5h</b> | S34 |



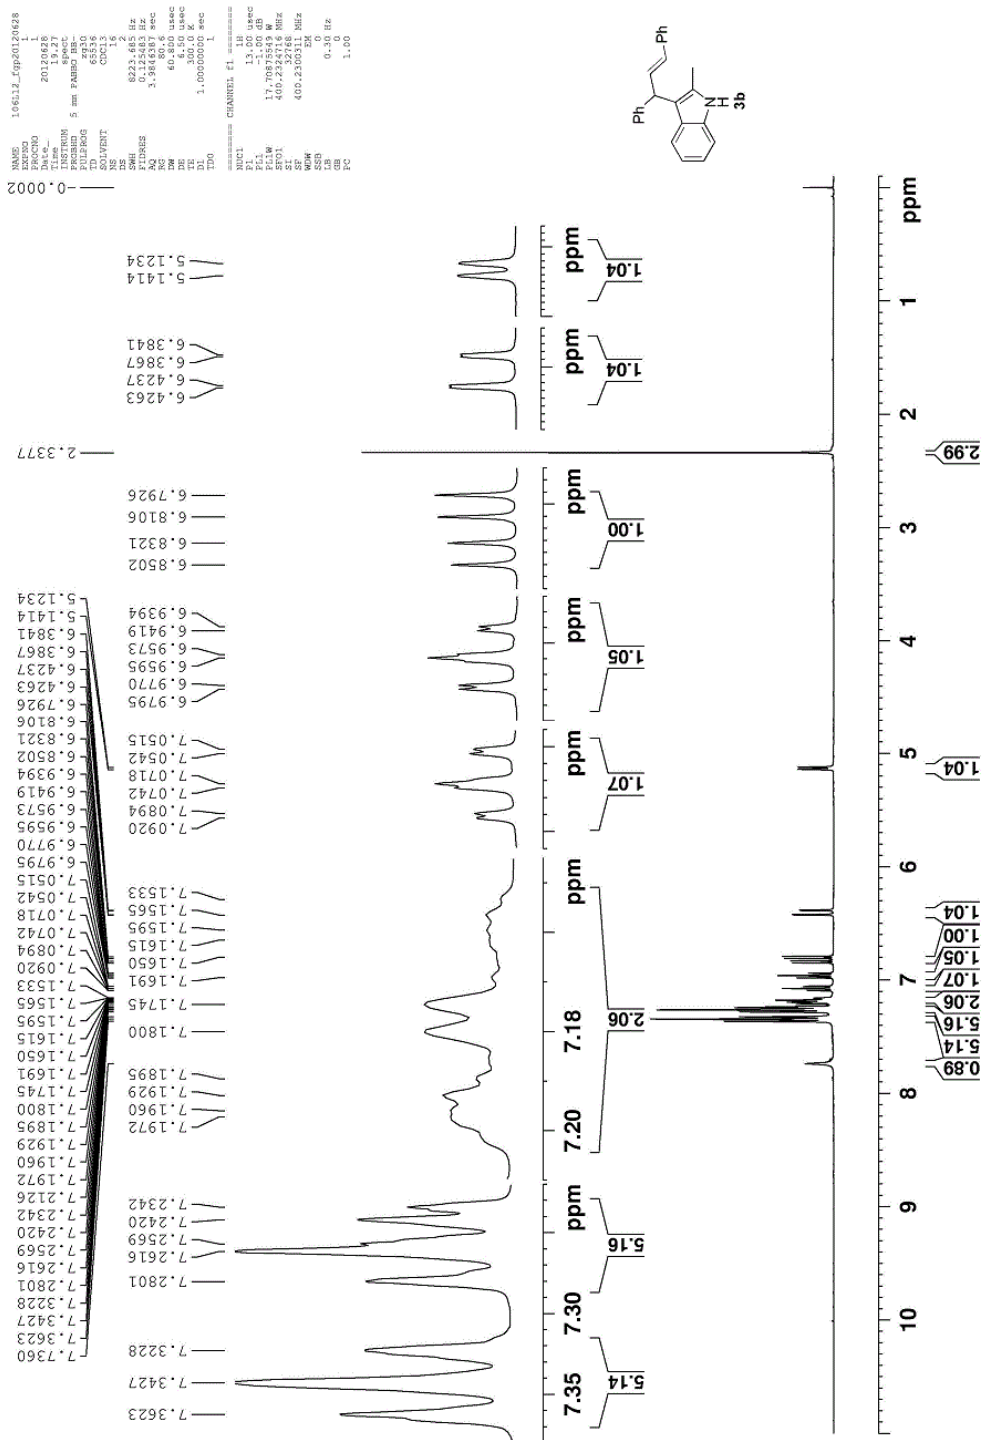

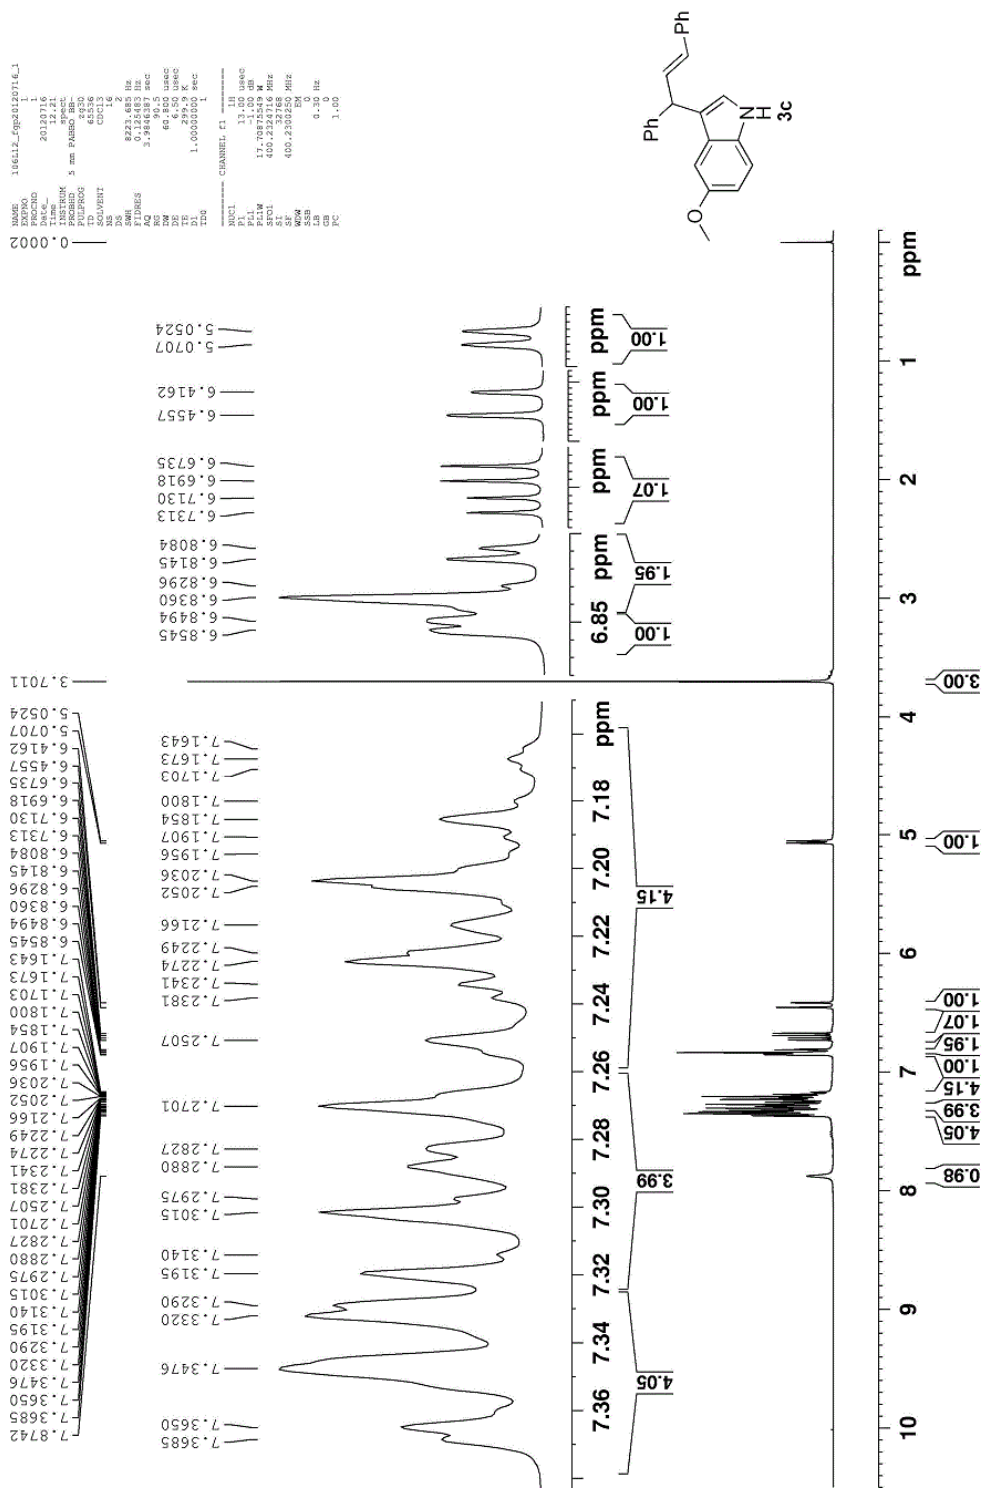



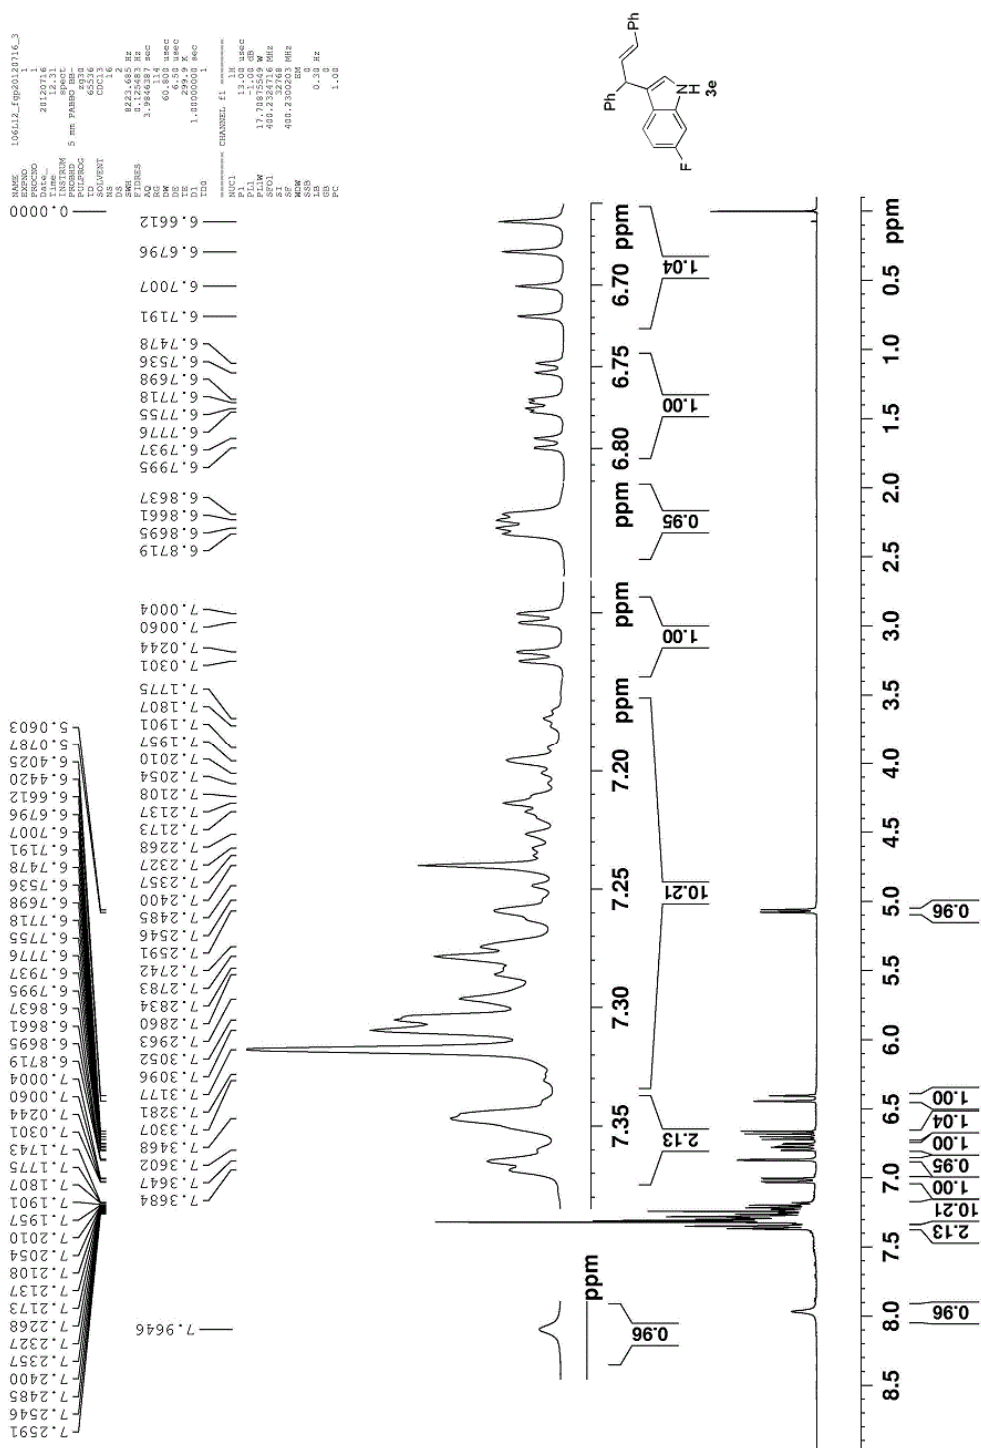











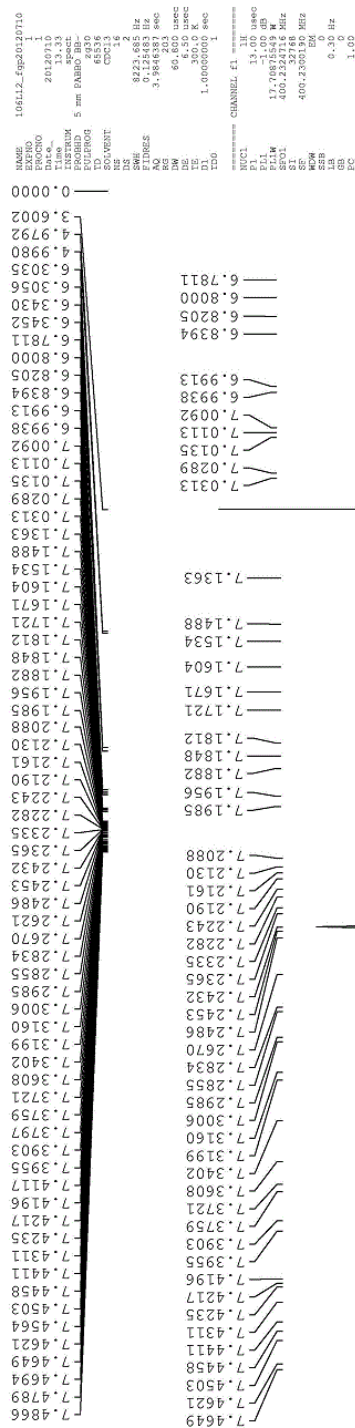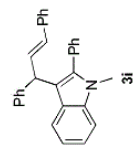



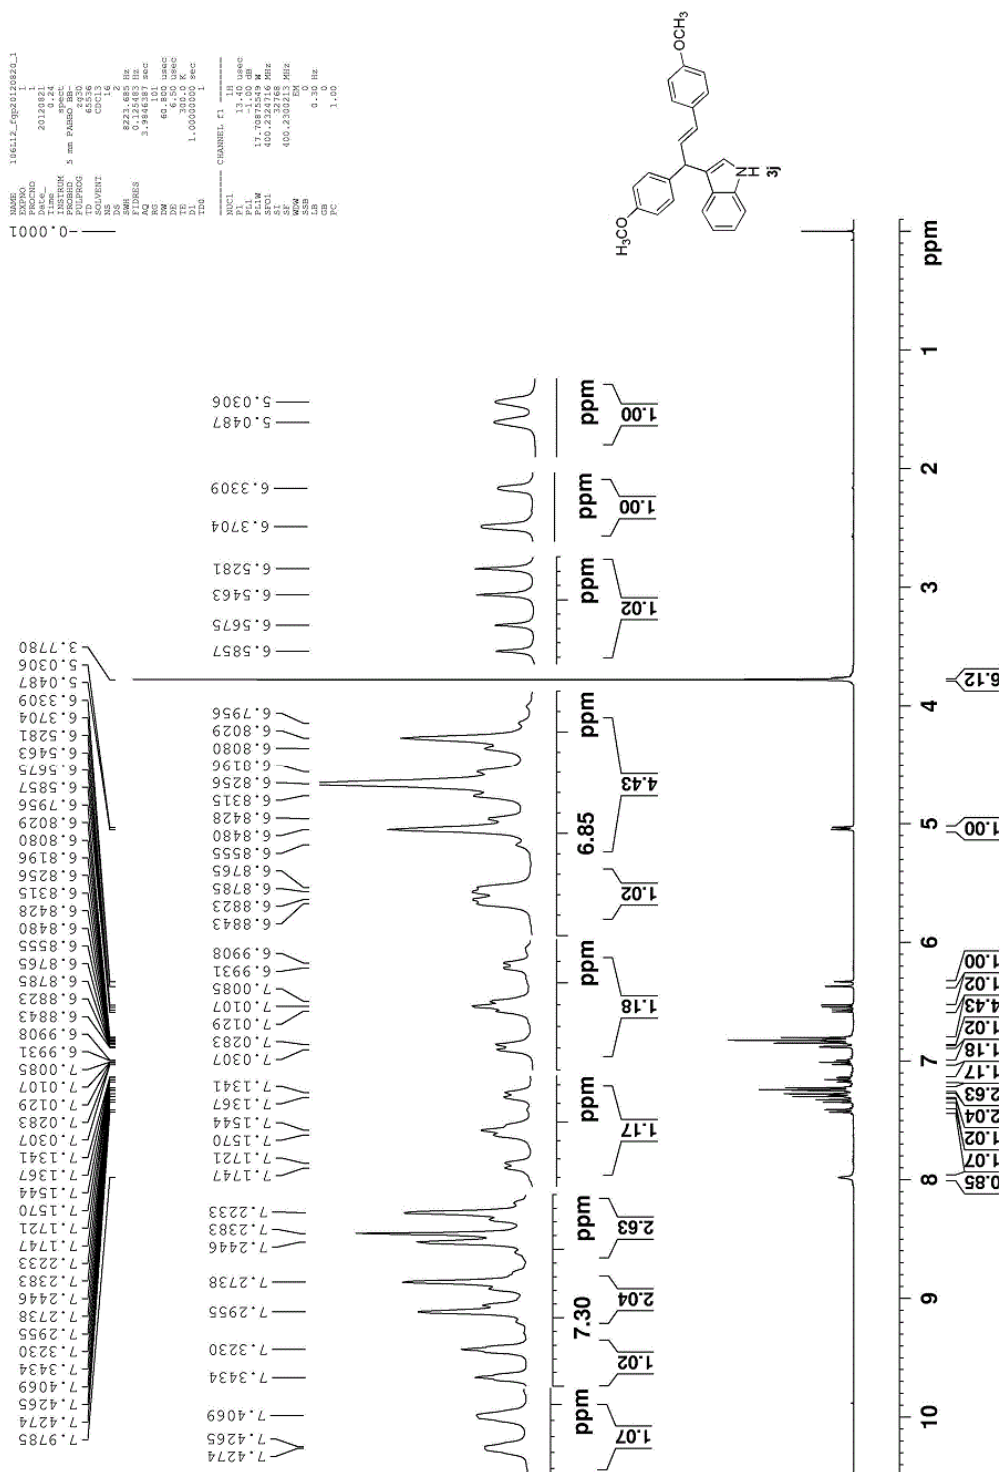

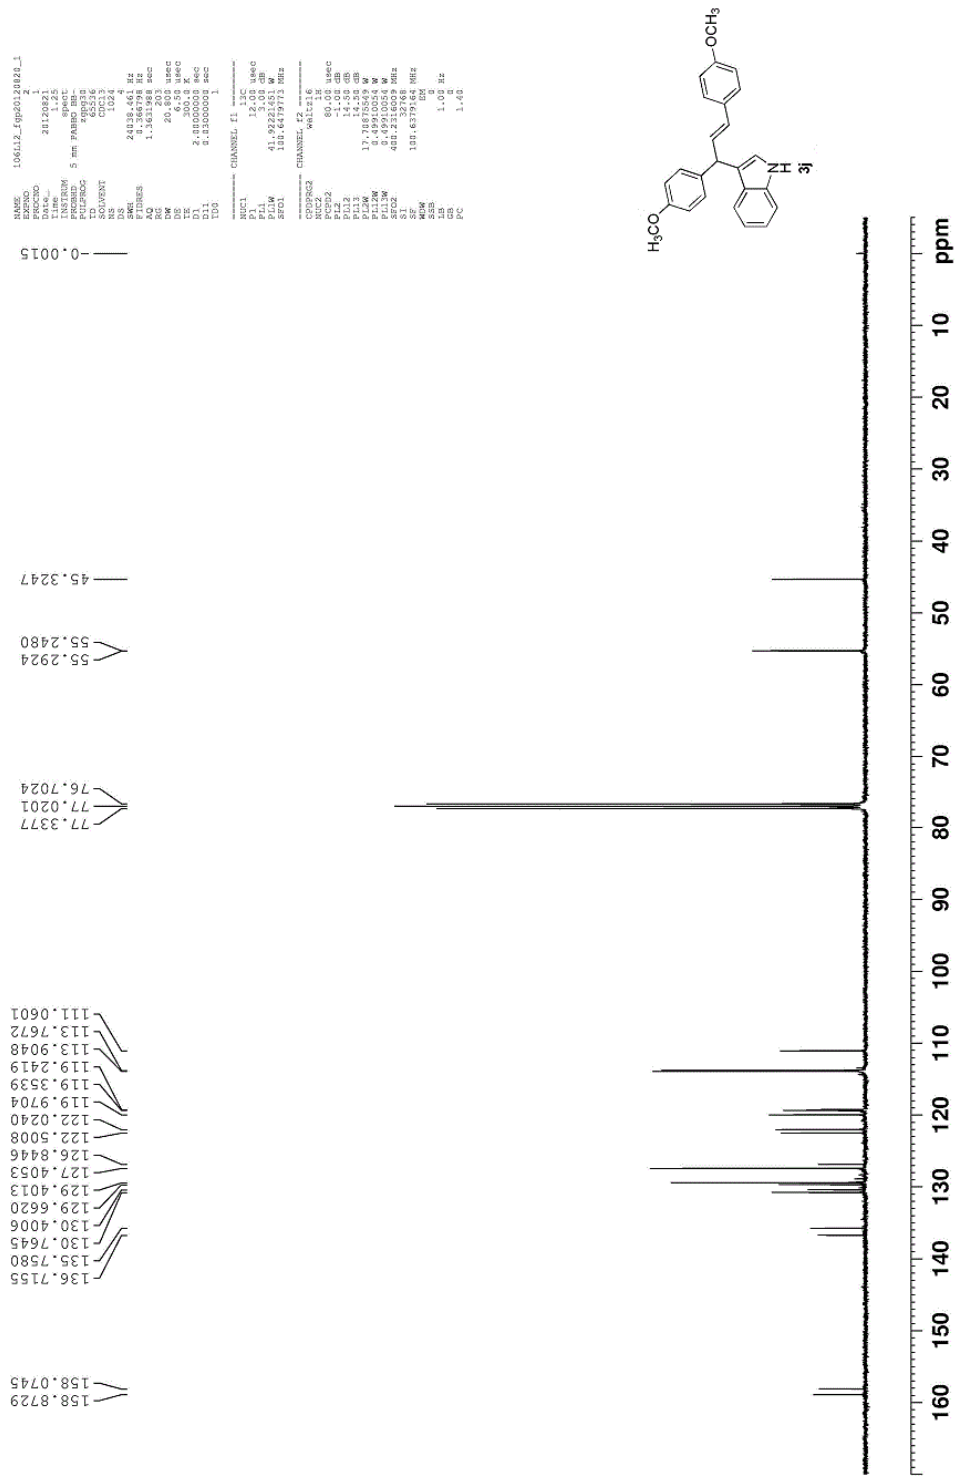

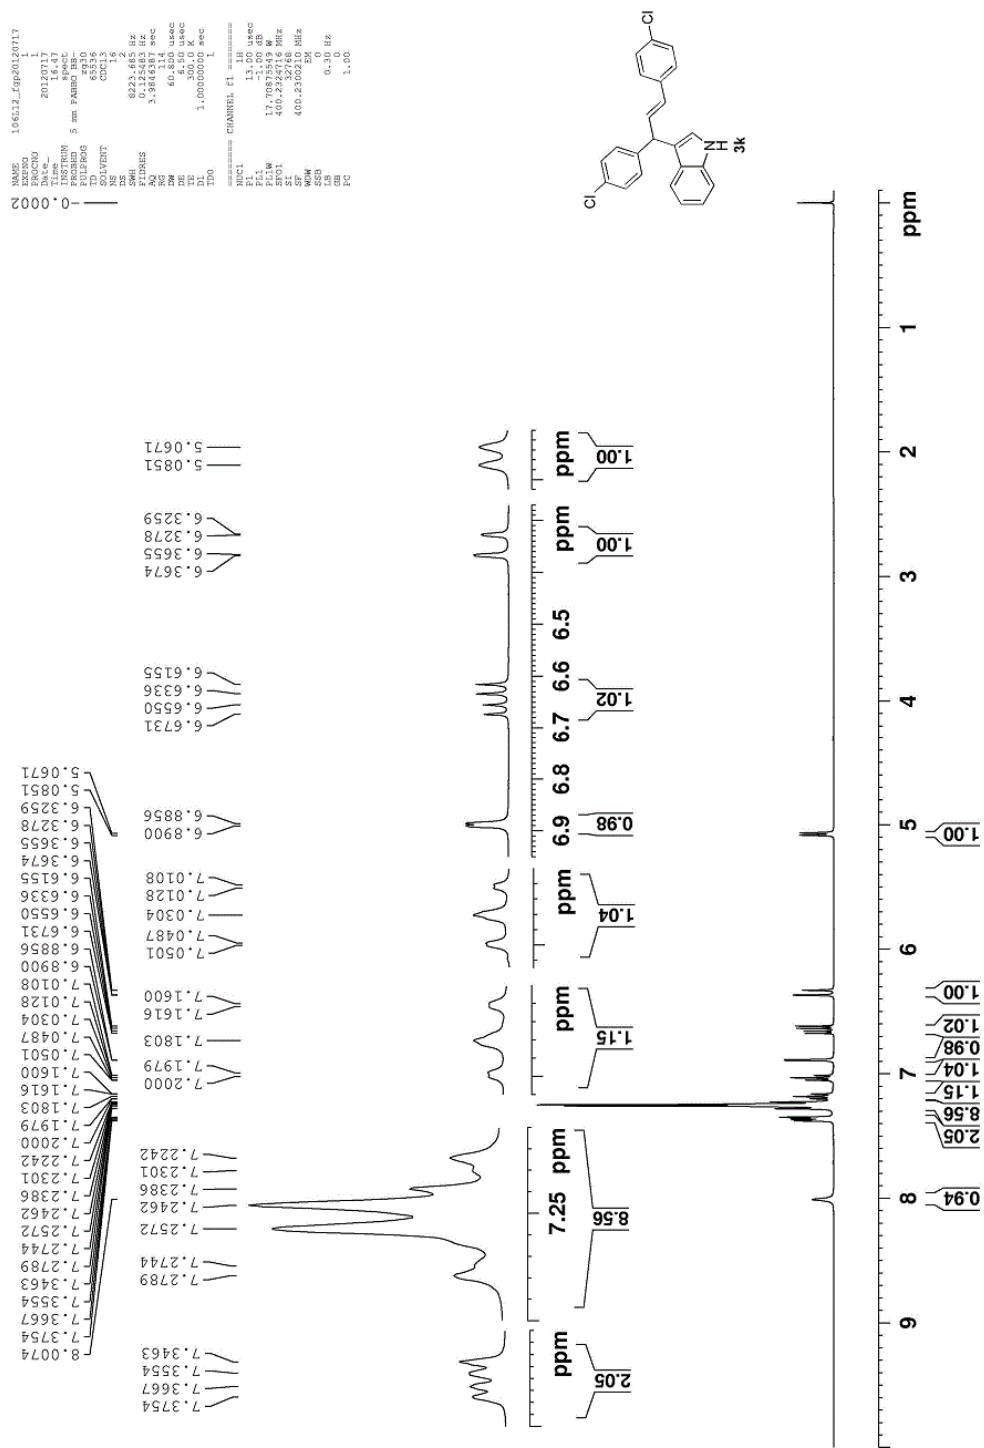





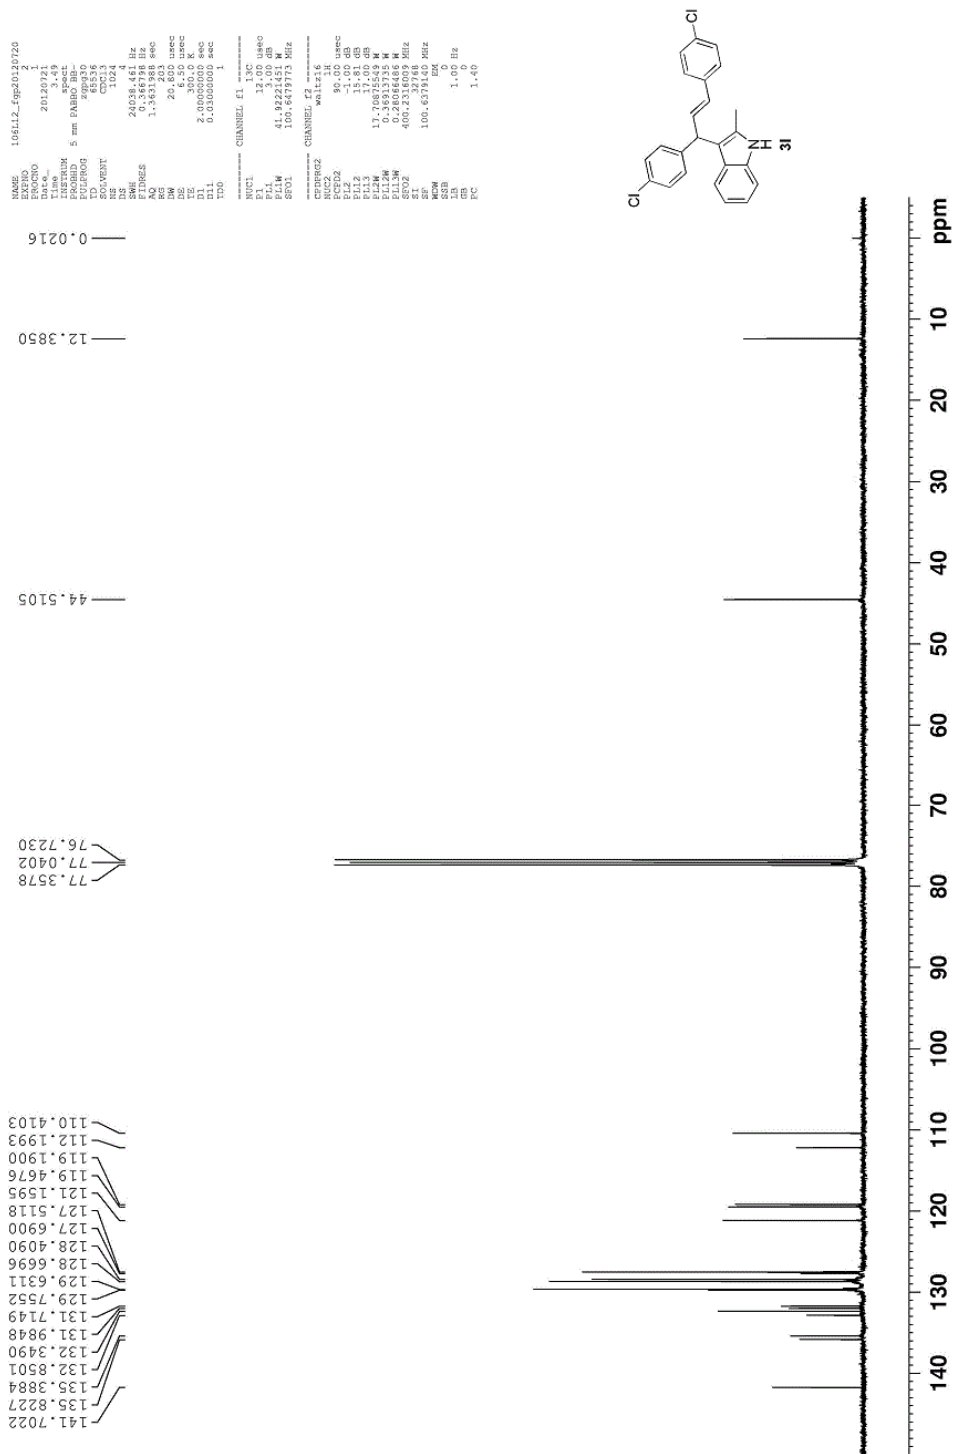

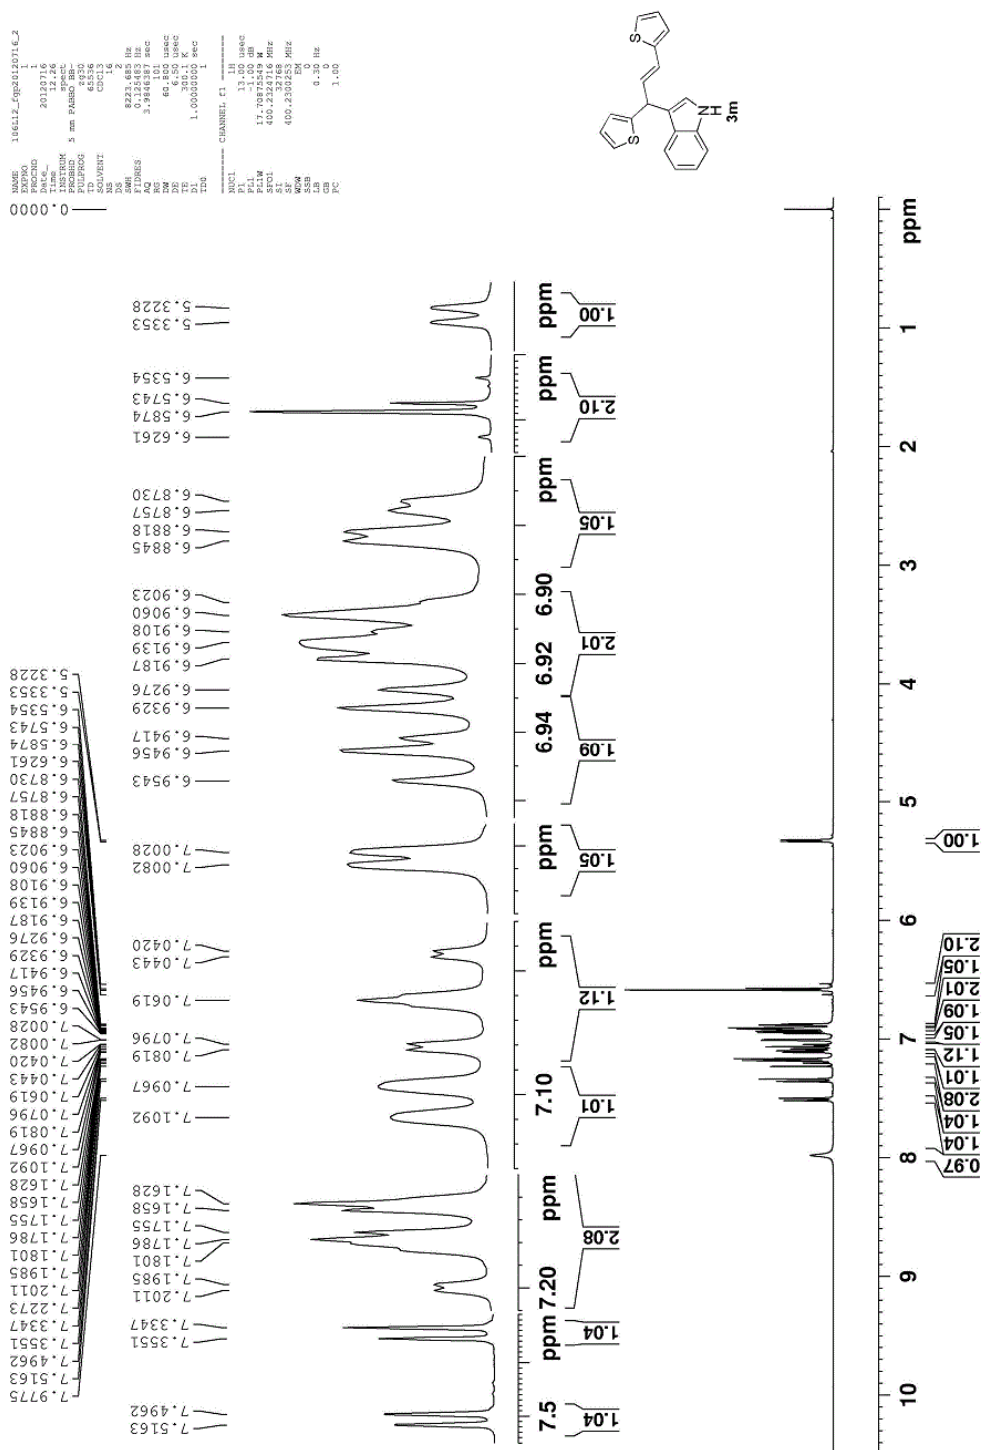

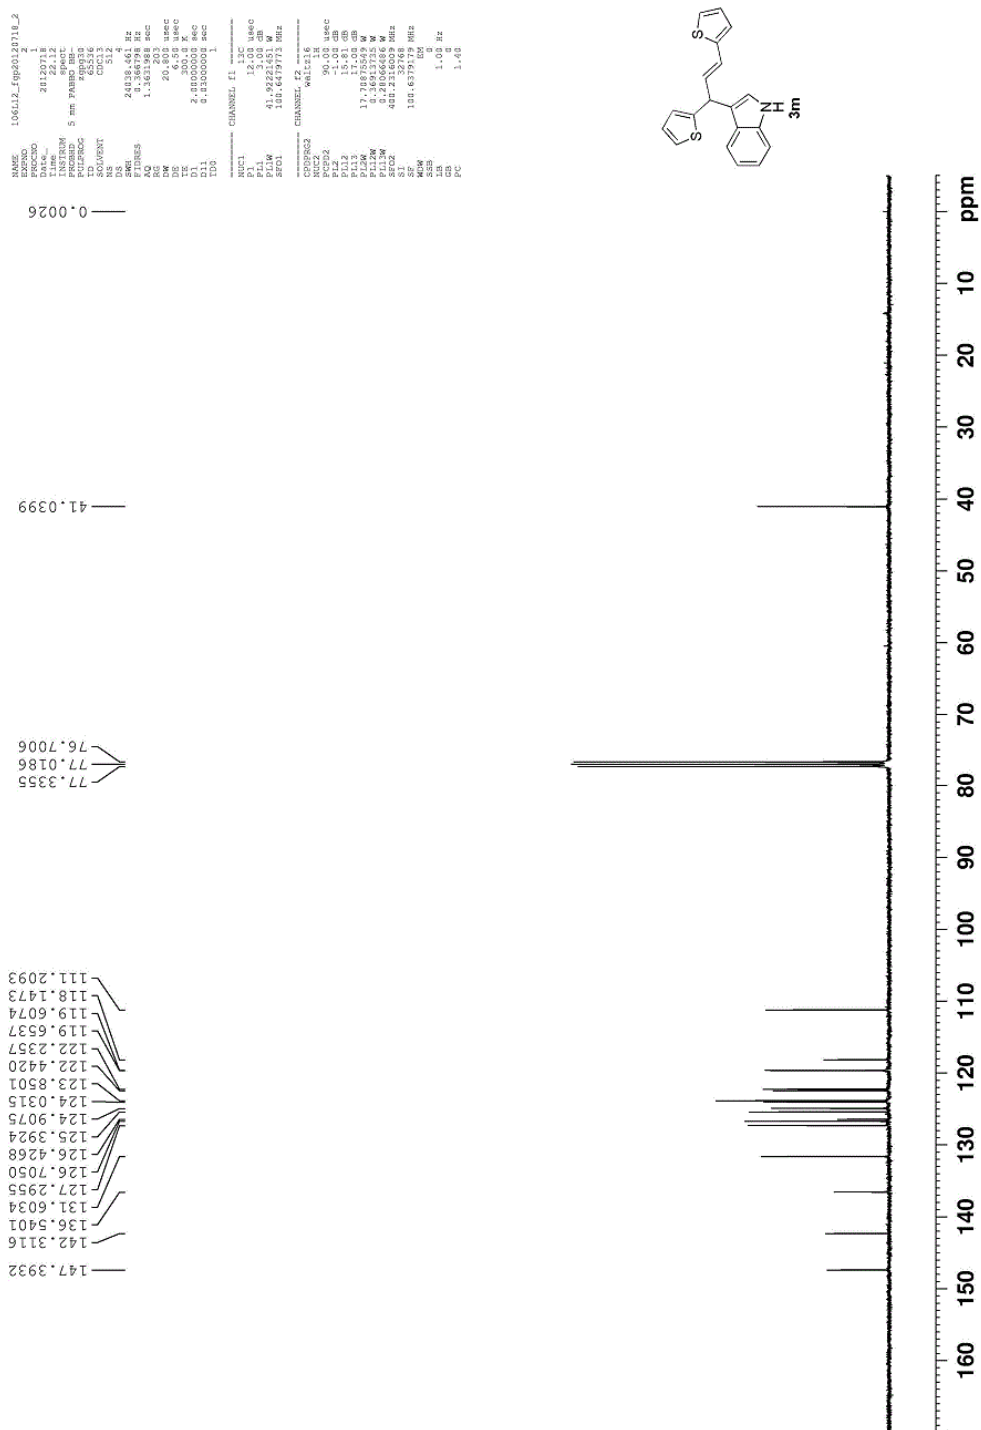

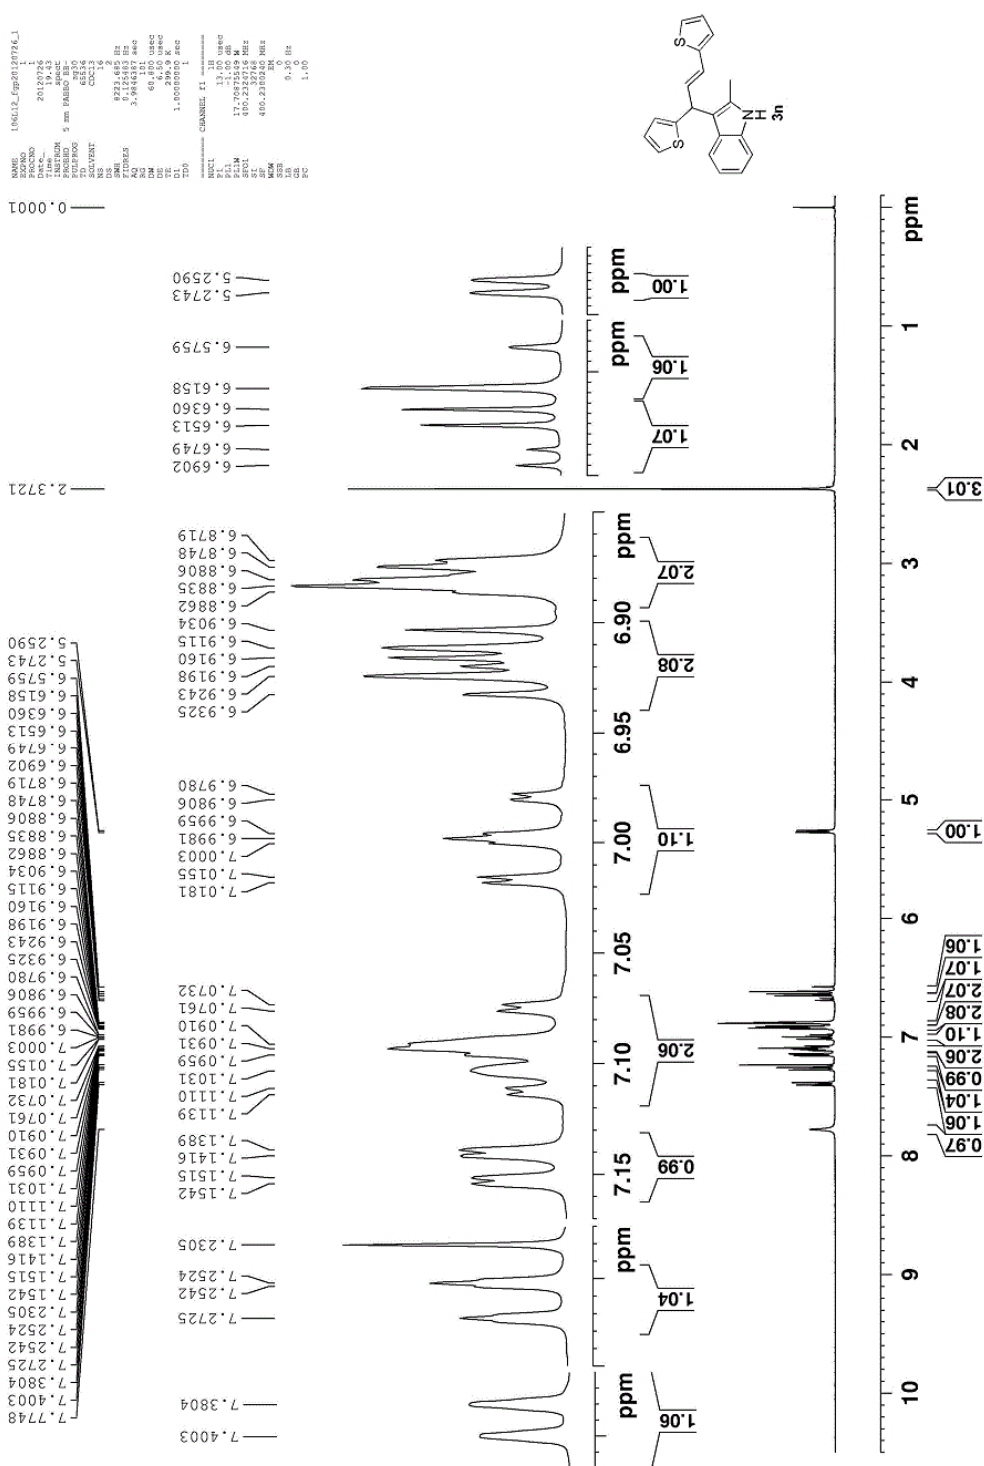

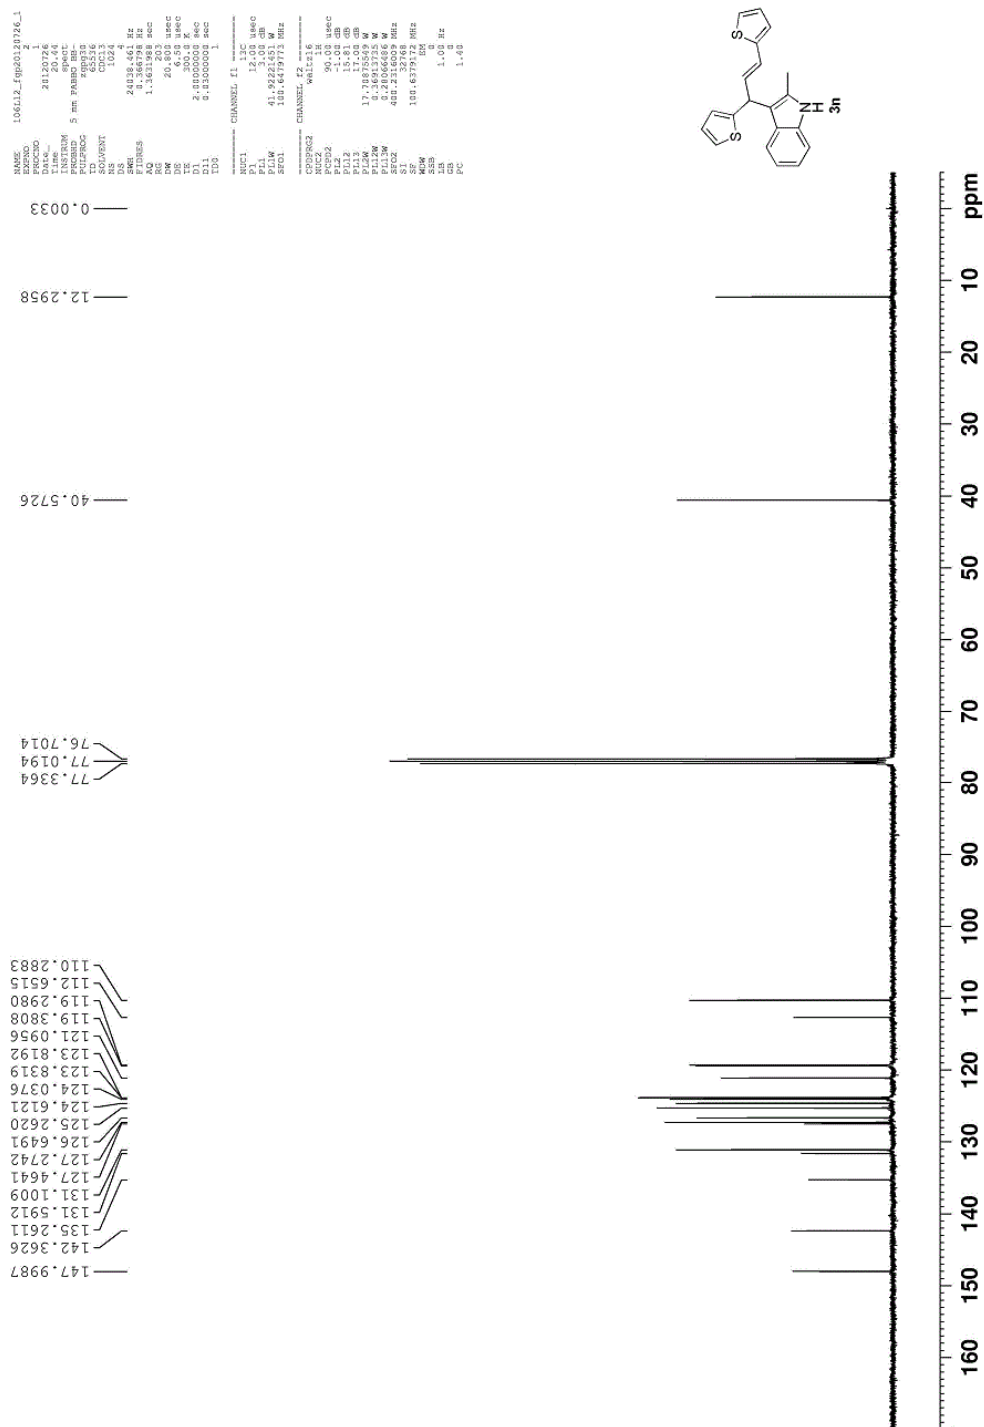

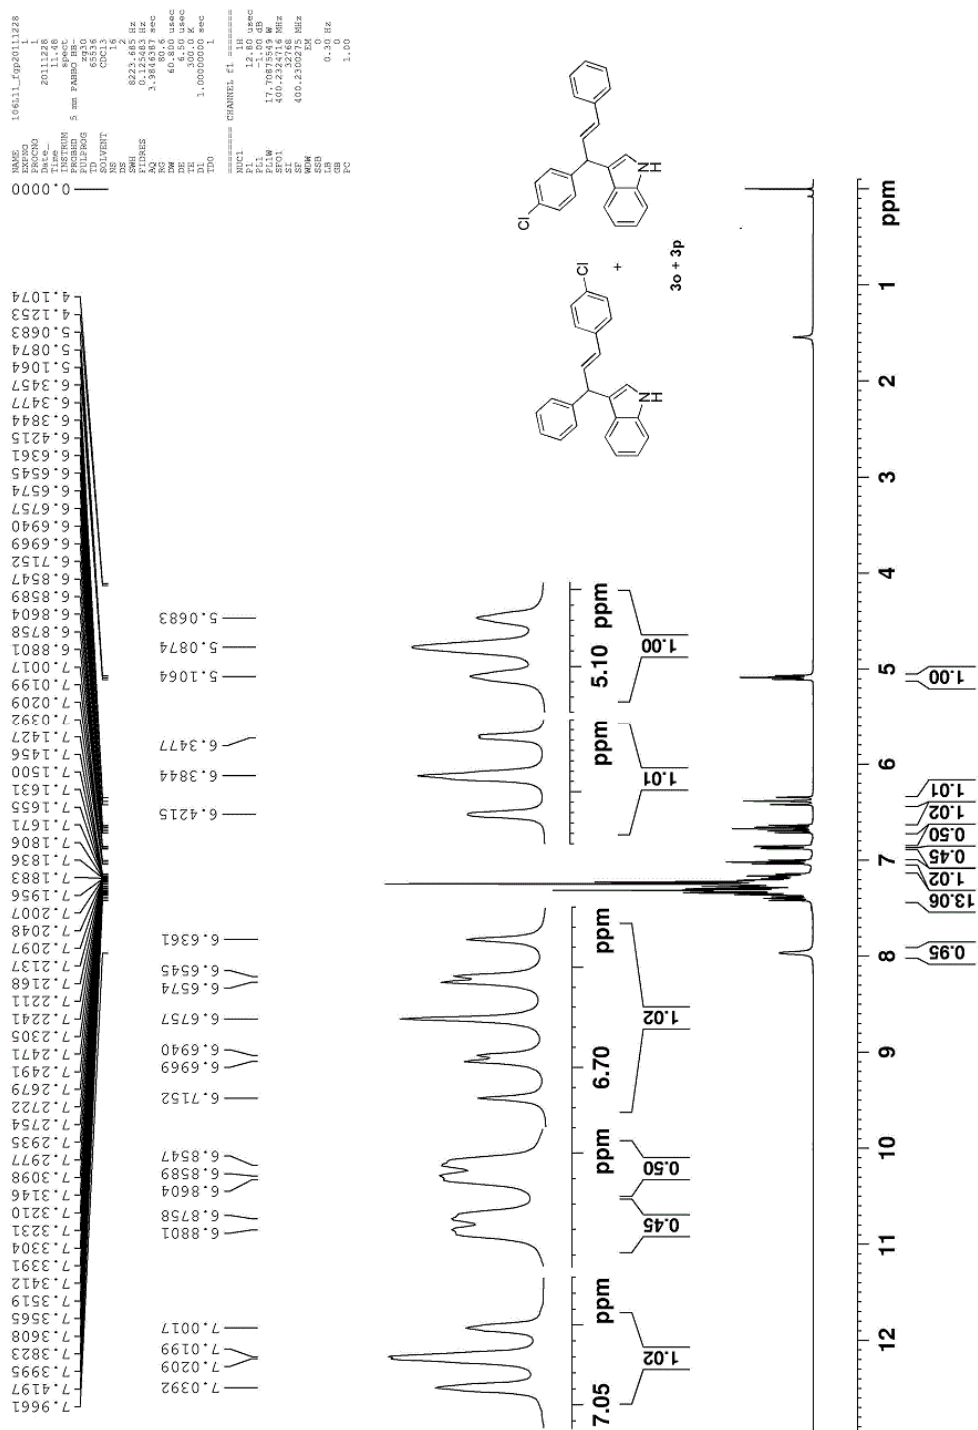

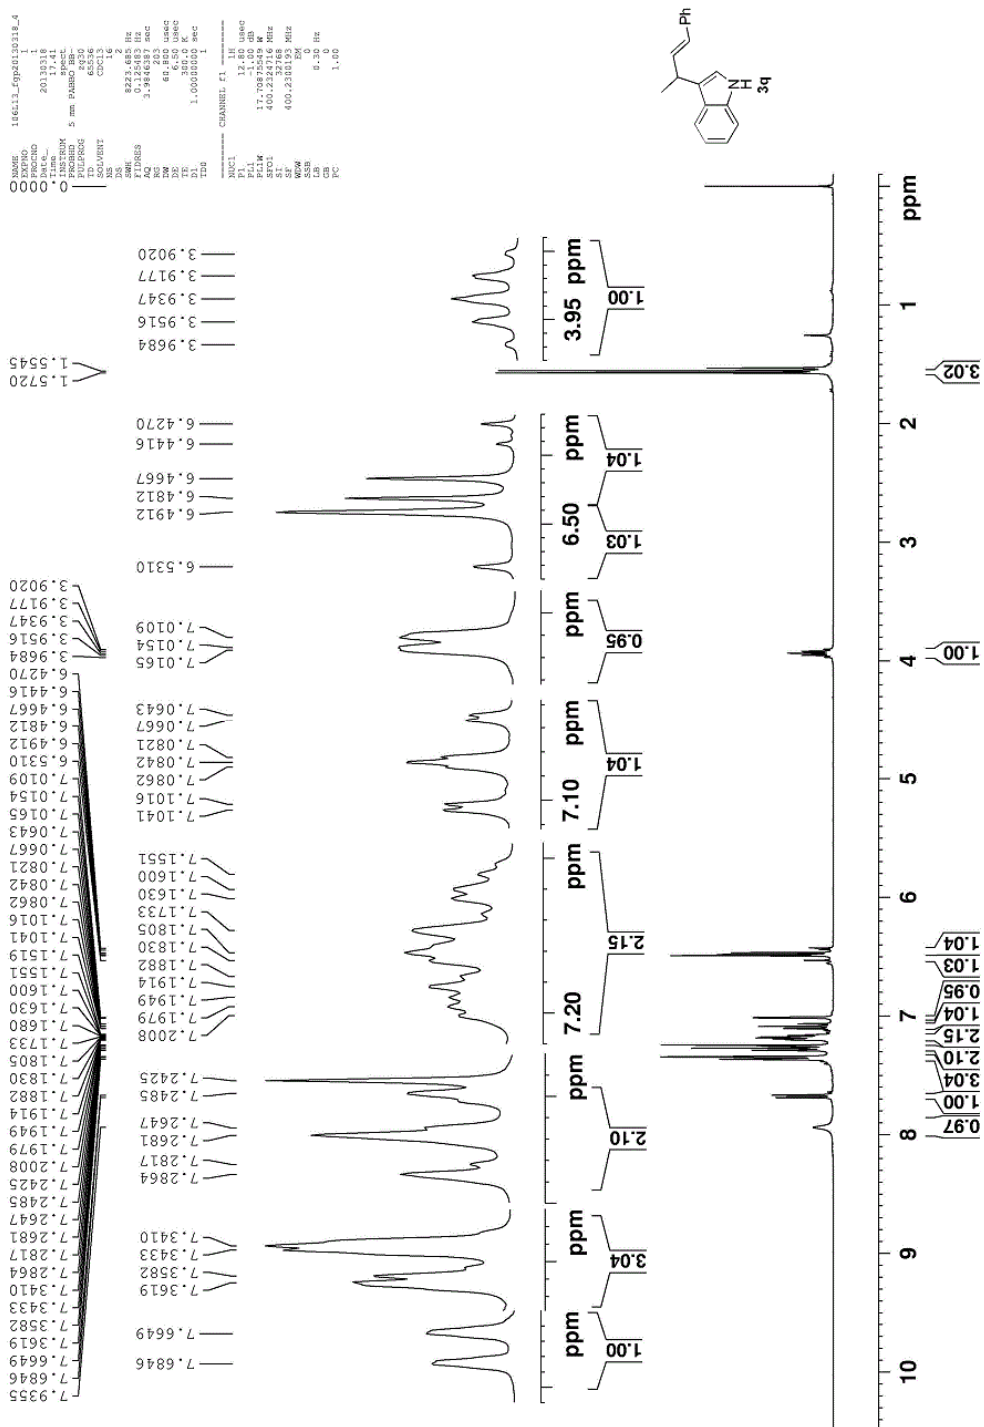







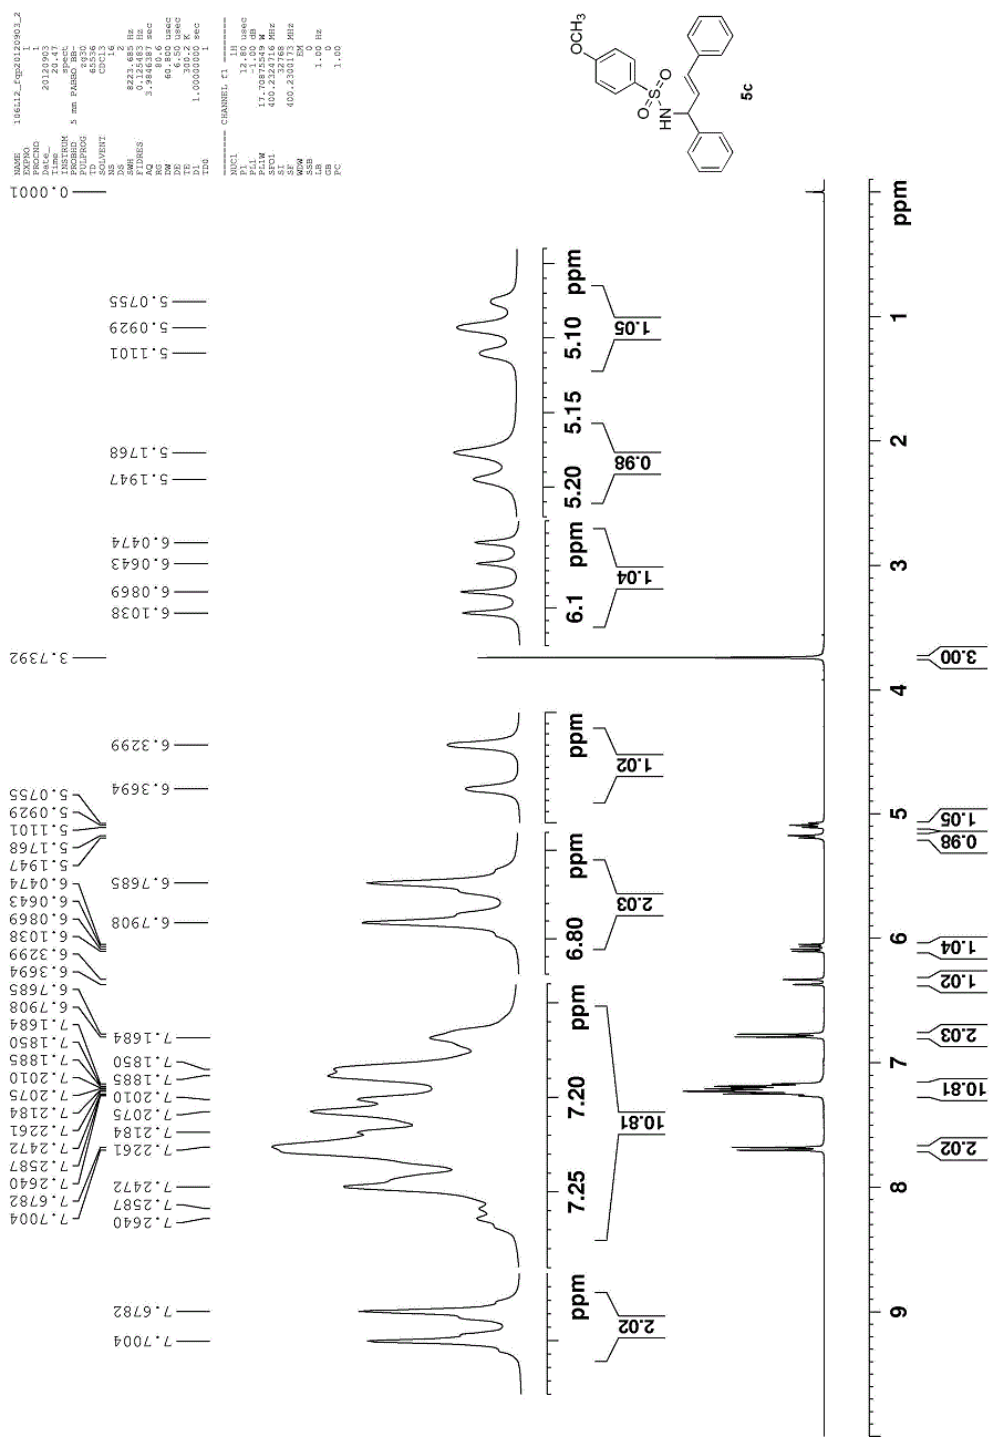

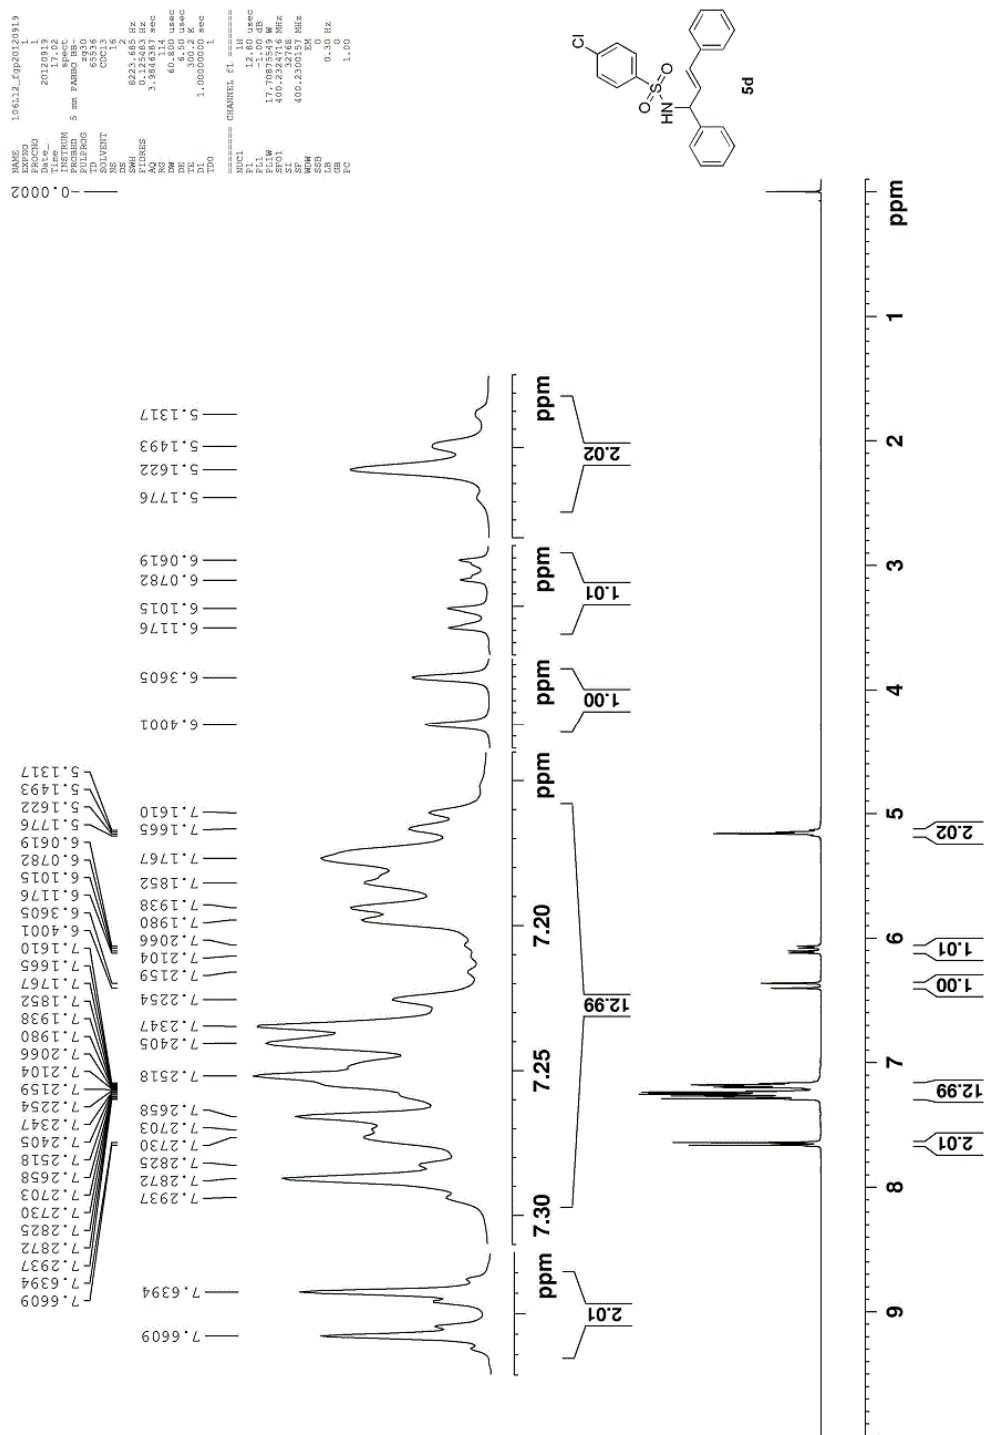

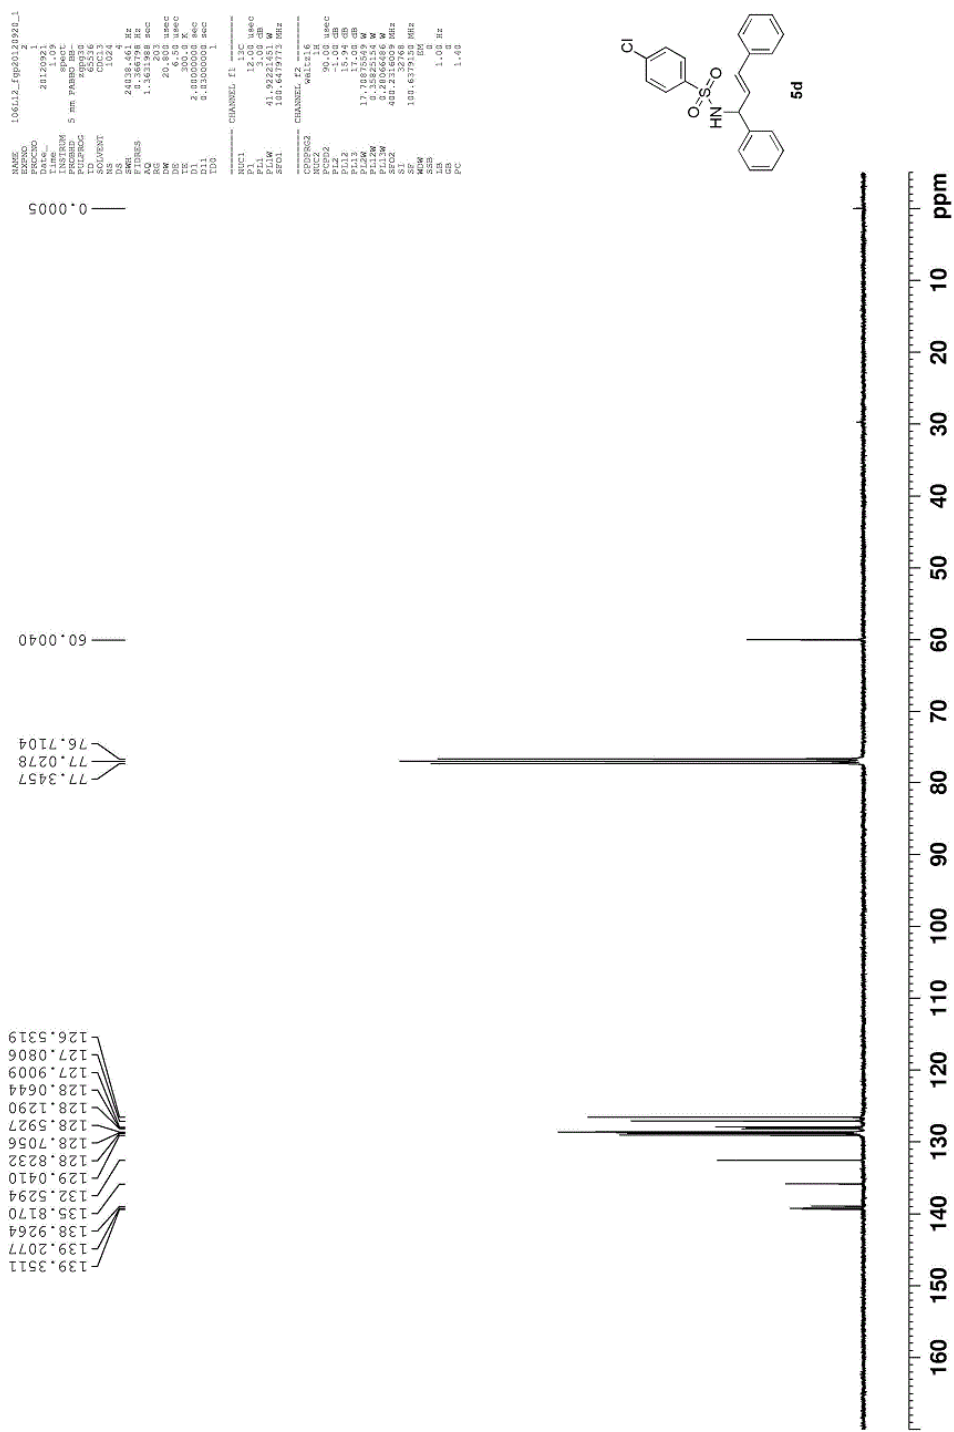

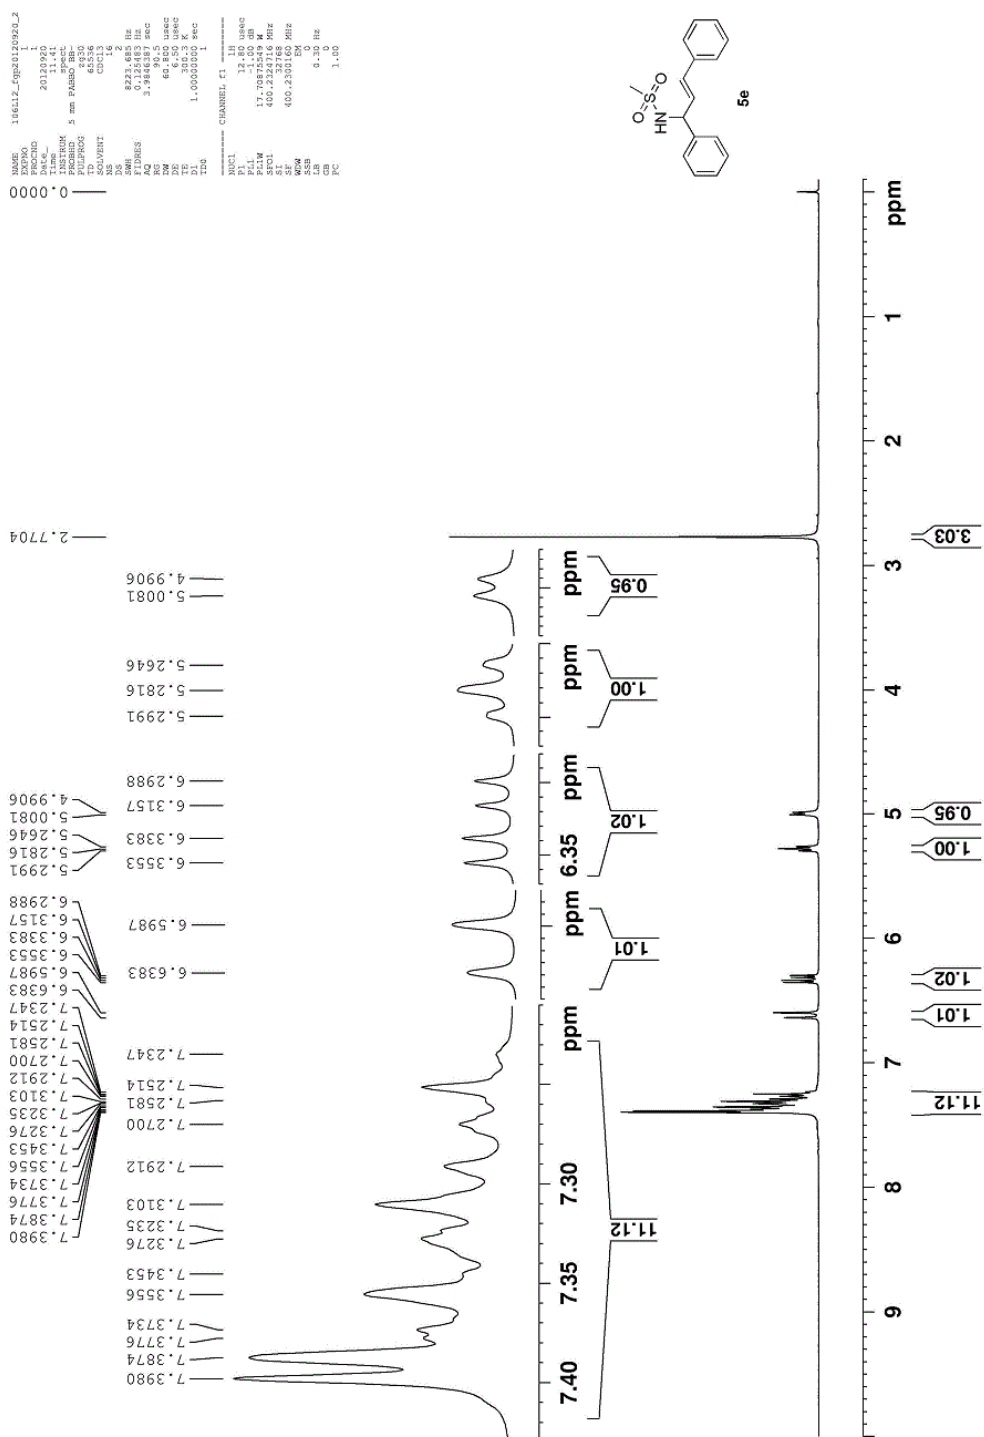









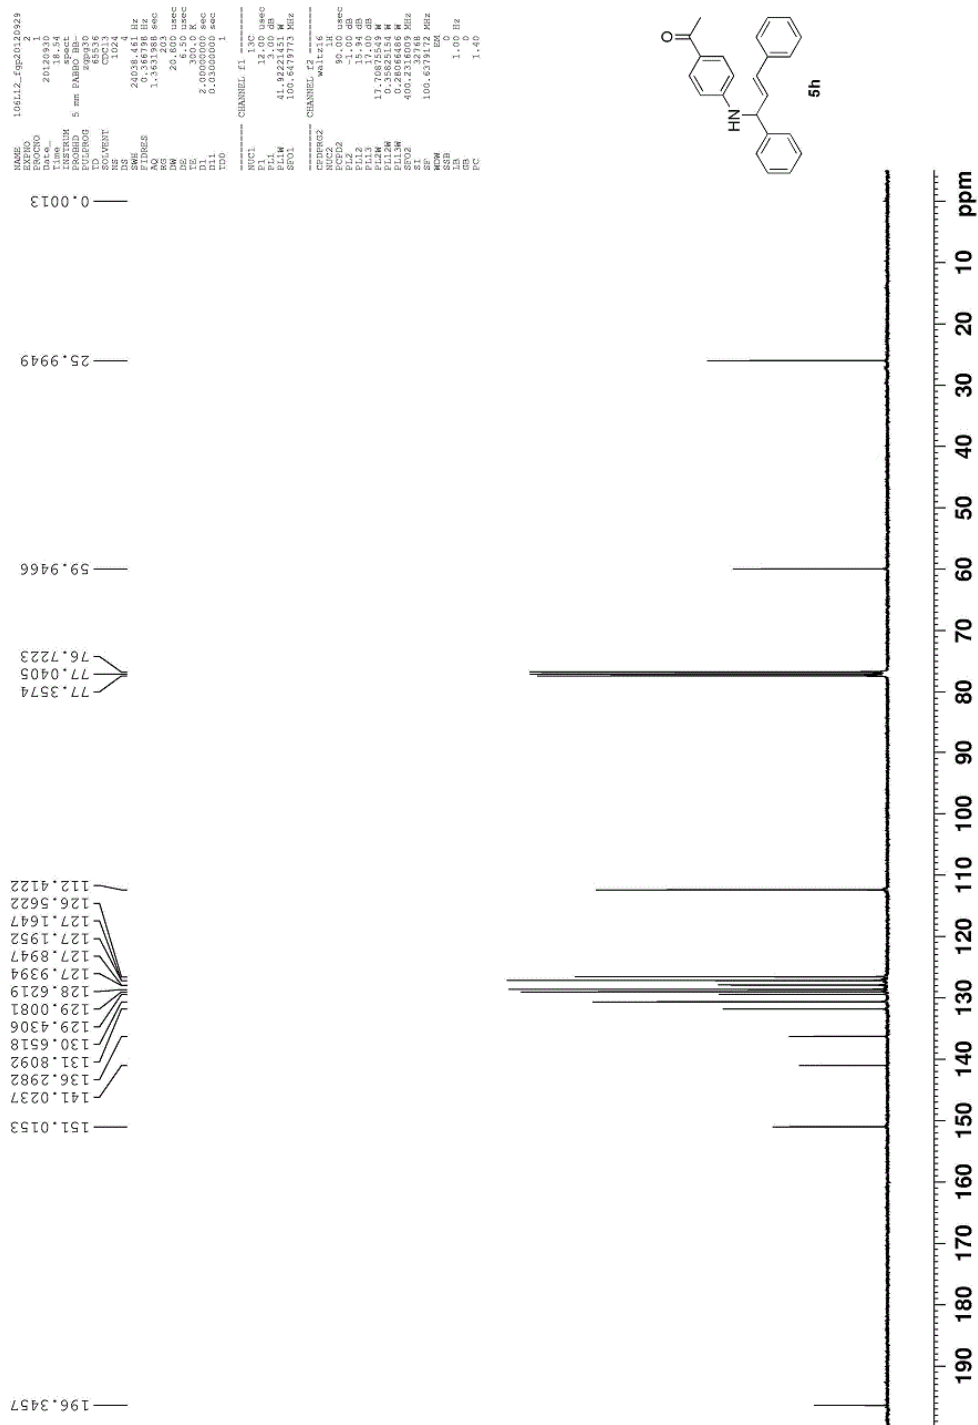

Supplement: c3gc40262b.pdf [file c3gc40262b.pdf]
